# Supplementary material
Source: PubMed Central journal article supplement (PMC3477348)
Supplement: bcp0074-0465-SD1.pdf [file bcp0074-0465-SD1.pdf]

| Parameter                               | Parameter estimates (RSE%) |        |
|-----------------------------------------|----------------------------|--------|
| <i>CL/F</i> pop. 1 (l h <sup>-1</sup> ) | 3.37                       | (5.5)  |
| <i>CL/F</i> pop. 2 (l h <sup>-1</sup> ) | 1.56                       | (12.6) |
| Probability (%) to belong to pop. 2     | 22.30                      | (36.9) |
| <i>V/F</i> (l)                          | 105                        | (4.9)  |
| MTT (h) fed                             | 2.44                       | (7.5)  |
| MTT (h) fasted                          | 0.598                      | (8.7)  |
| <i>F</i> (%) when TB treatment          | 59.90                      | (8.6)  |
| Proportional error (%)                  | 8.43                       | (5.4)  |
| BSV <i>CL/F</i> (%)                     | 24.00                      | (15.4) |
| BSV <i>F</i> when TB treatment (%)      | 33.30                      | (27.0) |
| BOV <i>F</i> (%)                        | 26.90                      | (9.5)  |
| BOV MTT (%)                             | 63.90                      | (9.0)  |

The values of *CL/F* and *V* refers to a typical person of 70 kg body weight. BOV, between occasion variability; BSV, between subject variability; *CL/F*, oral clearance; *F*, bioavailability; MTT, meant transit time; pop., population; TB, tuberculosis; *V/F*, apparent volume of distribution.
